# Supplementary material for: Predictors of photo naming: Dutch norms for 327 photos
Source: Springer Nature journal article supplement (doi:10.3758/s13428-015-0613-0), 2015-06-27
Supplement: MOESM1 [file 13428_2015_613_MOESM1_ESM.xlsx]

## Sheet: Sheet1
counter	image	word_expected_name	dominant_name	objective_VC	subjective_VC	image_agreement	Imageability	proportion	H_sta	AoA	log_word_frequency	concept_familiarity	nr_letter	nr_syllable_d	naming_RT
1	Accordeon.jpg	Accordeon	Accordeon	63	3.89	5.84	5.82	0.7	0.18	5.63	0.08	2.23	9	3	1265
2	Ambulance.jpg	Ambulance	Ambulance	89	5.91	3.42	6.36	0.84	0.19	4.43	1.4	3.76	9	4	1219
3	Zeepkist.jpg	Zeepkist	Auto	91	3.74	2.48	3.61	0.54	0.26	5.57	2.66	4.02	8	2	1485
4	Bambus.jpg	Bamboe	Bamboe	111	3.89	6.03	5.36	0.91	0.32	4.97	-0.16	2.33	6	2	1080
5	Basketball.jpg	Basketbal	Basketbal	133	4.74	5.94	6.45	0.94	0.25	4.27	0.94	2.97	9	3	1115
6	Batterij.jpg	Batterij	Batterij	44	2.66	6.26	6.39	1	0	4.1	0.83	3.97	8	3	903
7	Steenbok.jpg	Steenbok	Berggeit	115	4.89	5.71	4.91	0.38	0.33	5.73	-1.04	2.2	8	2	1583
8	Bierfles.jpg	Bierfles	Bierfles	27	1.23	5.94	6.61	0.53	0.51	5.53	-0.74	3.9	8	2	1138
9	Bieslook.jpg	Bieslook	Bieslook	34	1.74	5.52	5.42	0.14	0.25	6.07	-0.68	2.8	8	2	1571
10	Lelie.jpg	Lelie	Bloem	58	2.57	4.29	4.94	0.76	0.27	5.37	1.13	3.95	5	2	1321
11	Lotus.jpg	Lotus	Bloem	44	3.23	4.77	4.24	0.76	0.23	6.23	1.13	3.95	5	2	1174
12	Overhemd.jpg	Overhemd	Blouse	59	2.43	4.03	6	0.32	0.49	4.9	0.57	3.76	8	3	1425
13	Olijfboom.jpg	Olijfboom	Boom	134	4.77	4.45	5.15	0.83	0.19	5.8	1.72	4.36	9	3	1154
14	Brottkorb.jpg	Broodmand	Broodjes	143	4.8	4.81	5.61	0.61	0.48	4.43	0.87	4.59	9	2	1243
15	Badkuip.jpg	Badkuip	Bubbelbad	51	4.26	3.65	6.18	0.53	0.37	3.77	0.38	2.79	7	2	1489
16	Klem.jpg	Klem	Clip	48	1.94	2.87	4.15	0.26	0.34	4.03	0.18	2.67	4	1	1785
17	Dynamo.jpg	Dynamo	Dynamo	107	4.2	6.13	5	0.79	0.17	6.57	-0.39	2.37	6	3	1398
18	Gasfles.jpg	Gasfles	Gasfles	114	5.26	4.61	5.15	0.47	0.29	5.93	-0.96	2.4	7	2	1459
19	Golfbal.jpg	Golfbal	Golfbal	96	2.94	6.48	6.45	0.83	0.17	4.73	-0.24	2.34	7	2	1233
20	Hamburger.jpg	Hamburger	Hamburger	50	3.77	5.32	6.67	0.83	0.33	3.93	0.93	3.4	9	3	969
21	Hangmat.jpg	Hangmat	Hangmat	127	5.03	5.74	6.39	0.94	0.16	5.03	-0.14	2.8	7	2	957
22	Hazelnoot.jpg	Hazelnoot	Hazelnoot	65	1.6	6.1	5.48	0.21	0.41	4.8	-0.47	3.14	9	3	1218
23	Kerstbal.jpg	Kerstbal	Kerstbal	76	2.37	5.52	6.03	1	0	3.33	-0.8	3.07	8	2	1066
24	Kerstman.jpg	Kerstman	Kerstman	68	3.69	4.35	6.79	1	0	3.33	1.44	2.83	8	2	1050
25	Peperkoek.jpg	Peperkoek	Koekjes	127	3.97	2.29	5.58	0.69	0.24	4.23	1.26	4.5	9	3	1333
26	Gloeilamp.jpg	Gloeilamp	Lamp	54	1.97	6.39	6.12	0.71	0.22	5.3	1.14	4.4	9	2	976
27	Kaart.jpg	Kaart	Landkaart	98	5.74	4.74	5.67	0.5	0.3	3.07	-0.02	3.08	5	1	1083
28	Landkaart.jpg	Landkaart	Landkaart	140	5.8	4.84	6.21	0.57	0.26	4.73	-0.02	3.08	9	2	1022
29	Lava.jpg	Lava	Lava	118	5.74	3.55	4.88	0.61	0.26	5.2	0.44	2.07	4	2	1602
30	Leeuwin.jpg	Leeuwin	Leeuw	47	4.11	5.97	6.06	0.57	0.45	4	1.17	2.91	7	2	1262
31	Luiaard.jpg	Luiaard	Luiaard	74	5.4	4.77	4.27	0.35	0.25	6.1	-0.09	2.21	7	2	1573
32	Maatbecher.jpg	Maatbeker	Maatbeker	26	1.86	5.68	6.09	0.83	0.17	5.67	-0.85	3.55	9	3	1264
33	Megafoon.jpg	Megafoon	Megafoon	87	2.71	5.23	5.67	0.32	0.3	6.07	-0.26	2.33	8	3	1364
34	Hamster.jpg	Hamster	Muis	53	2.26	5.39	6.21	0.63	0.29	3.5	1.05	3.47	7	2	1079
35	Orchid.jpg	Orchidee	Orchidee	21	2.54	5.87	5.3	0.16	0.26	6.5	-0.07	2.34	8	3	1555
36	Palmboom.jpg	Palmboom	Palmboom	107	3.54	6.16	6.52	0.97	0.09	4.83	-0.16	2.78	8	2	1104
37	Pruim.jpg	Pruim	Pruim	36	1.4	5.81	5.52	0.59	0.24	3.87	0.05	2.76	5	1	1557
38	Puppy.jpg	Puppy	Puppy	87	3.86	5.29	6.42	0.57	0.35	2.83	0.75	3.17	5	2	1171
39	Sauna.jpg	Sauna	Sauna	98	5.17	5.68	4.94	0.87	0.16	5.97	0.33	2.9	5	2	1147
40	Saxofoon.jpg	Saxofoon	Saxofoon	93	3.74	5.71	6.06	0.65	0.3	5.33	-0.01	2.7	8	3	1231
41	Kabelbaan.jpg	Kabelbaan	Skilift	35	5.23	4.19	5.3	0.65	0.27	5.2	-0.64	2.47	9	3	1415
42	Skilift.jpg	Skilift	Skilift	80	4.8	5.61	5.48	0.61	0.21	5.6	-0.64	2.47	7	1	1146
43	Gifslang.jpg	Gifslang	Slang	110	3.94	4.39	4.91	0.81	0.17	5.27	1.33	2.58	8	2	1001
44	Adder.jpg	Adder	Slang	95	4.71	4.84	4.3	0.97	0.04	5.4	1.33	2.58	5	2	855
45	Stokbrood.jpg	Stokbrood	Stokbrood	97	3.77	5.06	6.58	0.84	0.27	3.7	-0.34	3.73	9	2	1120
46	Fax.jpg	Fax	Telefoon	47	4.09	4.23	4.03	0.79	0.23	6.2	2.2	4.83	3	1	1248
47	Tennisbal.jpg	Tennisbal	Tennisbal	126	1.89	6.65	6.58	0.91	0.16	3.8	-0.41	3.07	9	3	883
48	Vijg.jpg	Vijg	Vijg	18	3.09	4.71	4.03	0.08	0.29	5.47	-0.64	2.37	4	1	1648
49	Haring.jpg	Haring	Vis	82	3.34	5.19	5.36	0.45	0.28	5.07	1.7	3.76	6	2	1202
50	Forel.jpg	Forel	Vis	89	2.94	4.65	4.33	0.94	0.12	5.63	1.7	3.76	5	2	1163
51	Vuurwerk.jpg	Vuurwerk	Vuurwerk	107	3.97	5.9	6.45	1	0	3.93	0.86	2.9	8	2	913
52	Walrus.jpg	Walrus	Walrus	114	4.26	5.39	5.42	0.64	0.17	4.7	0.01	2.27	6	2	1281
53	Wereldbol.jpg	Wereldbol	Wereldbol	48	4.49	4.9	6.7	0.65	0.42	4.37	-0.57	3.41	9	3	1172
54	Zandloper.jpg	Zandloper	Zandloper	65	3.17	5.52	6.21	1	0	5	0.07	2.48	9	3	1063
55	Zebrapad.jpg	Zebrapad	Zebrapad	91	2.29	6.29	6.39	0.97	0.16	4.17	-0.68	4	8	3	930
56	Zeepbel.jpg	Zeepbel	Zeepbel	62	3.8	6.26	6	0.34	0.31	3.43	-0.16	2.82	7	2	1587
57	Pin.jpg	Pin	Punaise	55	2.26	3.45	3.91	0.8	0.26	5.1	-0.74	2.83	3	1	1219
58	Wasbeer.jpg	Wasbeer	Wasbeer	105	3.86	6.1	5.39	0.44	0.25	4.47	0.2	2.1	7	2	1429
59	Duiker.jpg	Duiker	Duiker	77	4.77	6.13	5.58	1	0	4.77	0.45	2.47	6	2	1152
60	Panda.jpg	Panda	Panda	112	4.43	6.39	6.58	0.91	0.2	3.37	-0.02	2.41	5	2	1072
61	Taart.jpg	Taart	Taart	15	4.31	4.16	6.55	0.63	0.34	2	1.5	3.63	5	1	996
62	Zalm.jpg	Zalm	Zalm	86	2.97	5.13	5.64	0.91	0.16	4.83	0.72	3.2	4	1	1049
63	Kaneel.jpg	Kaneel	Kaneel	30	2.63	4.06	4.79	0.84	0.24	4.83	0.16	3.5	6	2	1341
64	Specht.jpg	Specht	Specht	111	4.37	5.77	5.06	0.84	0.21	5.47	-0.3	2.6	6	1	1094
65	Bever.jpg	Bever	Bever	93	3.86	5.42	5.7	0.44	0.35	4.37	0.47	2.28	5	2	1277
66	Puzzel.jpg	Puzzel	Puzzel	104	5.23	4.77	6.03	0.59	0.34	2.63	0.72	3.31	6	2	961
67	Robot.jpg	Robot	Robot	55	3.37	5.03	5.97	0.84	0.21	4.1	1.09	2.83	5	2	1039
68	Waaier.jpg	Waaier	Waaier	95	2.09	5.84	5.27	1	0	5.3	0.01	2.53	6	2	1176
69	Wol.jpg	Wol	Wol	91	5.03	5.45	5.24	0.71	0.22	3.57	0.57	3.13	3	1	1202
70	Walnoot.jpg	Walnoot	Walnoot	55	1.89	6.16	6.24	0.8	0.2	4.43	-0.15	3.37	7	2	1155
71	Inktpot.jpg	Inktpot	Inkt	43	2.77	5.97	5.73	0.87	0.18	4.83	0.71	3.33	7	2	1226
72	Wafel.jpg	Wafel	Wafel	90	5.23	5	6.3	0.6	0.22	3.8	0.13	3.23	5	2	1238
73	Diamant.jpg	Diamant	Diamant	69	3.8	6.19	6.21	0.94	0.16	4.67	1.05	2.62	7	2	1056
74	Heks.jpg	Heks	Heks	28	3.03	3.55	6	0.72	0.17	3	1.43	2.38	4	1	1372
75	Krab.jpg	Krab	Krab	89	3.2	6.1	6.09	0.81	0.29	4.13	0.59	2.57	4	1	1001
76	Salade.jpg	Salade	Salade	111	4.77	5.52	5.64	0.88	0.16	4.6	1	4.23	6	2	1186
77	Bestek.jpg	Bestek	Bestek	34	2.49	5.48	6.03	0.68	0.27	3.23	0.31	4.66	6	2	1237
78	Geschenk.jpg	Cadeau	Cadeau	94	2.46	5.45	5.79	0.88	0.19	2.73	1.47	4	6	2	970
79	Kompas.jpg	Kompas	Kompas	50	3.51	5.52	6.09	0.82	0.17	4.83	0.66	2.63	6	2	1164
80	Luipaard.jpg	Luipaard	Luipaard	53	3.83	5.58	5.48	0.34	0.25	4.77	0.3	2.53	8	2	1710
81	Pot.jpg	Pot	Pan	96	3.34	2.03	5.3	0.79	0.19	2.57	0.97	3.1	3	1	1116
82	Bloemenpot.jpg	Bloempot	Pot	76	4.4	3.81	6.21	0.48	0.23	3.8	1.49	3.1	8	2	1352
83	Scharnier.jpg	Scharnier	Scharnier	86	2.91	5.03	5	0.71	0.21	5.7	-0.57	2.77	9	2	1411
84	Adelaar.jpg	Adelaar	Arend	60	3.63	5.48	5.61	0.33	0.34	4.83	0.31	2.2	7	3	1330
85	Gorilla.jpg	Gorilla	Gorilla	46	4	6.45	6.24	0.72	0.24	4.03	0.71	2.53	7	3	1040
86	Knop.jpg	Knop	Knop	47	2.83	3.61	4.88	0.27	0.26	2.73	1.22	3.7	4	1	1429
87	Heftruck.jpg	Heftruck	Heftruck	58	3.31	5.61	4.97	0.36	0.2	5.73	-0.57	2.38	8	2	1203
88	Hart.jpg	Hart	Hart	67	1.86	4.52	6.3	1	0	2.67	2.29	4.17	4	1	935
89	Hangslot.jpg	Hangslot	Slot	51	2.14	5.1	6.12	0.97	0.04	5.27	1.72	4.13	8	2	980
90	Biet.jpg	Biet	Biet	28	1.71	5	5.12	0.32	0.28	4.5	-0.12	2.67	4	1	1618
91	Kalf.jpg	Kalf	Kalf	115	3.83	5.26	6.12	0.59	0.52	3.13	0.49	3	4	1	1336
92	Koriander.jpg	Koriander	Peterselie	70	3.31	3.84	3.64	0.32	0.29	7.4	-0.11	3.24	9	4	1590
93	Trechter.jpg	Trechter	Trechter	34	1.31	5.29	5.79	0.71	0.26	5.17	-0.28	2.73	8	2	1401
94	Cactus.jpg	Cactus	Cactus	126	3.91	4.87	6.3	0.86	0.17	4.43	0.26	2.47	6	2	1048
95	Krokodil.jpg	Krokodil	Krokodil	86	3.97	5.94	6.55	1	0	3.27	0.69	2.57	8	3	971
96	Mol.jpg	Mol	Mol	116	3.6	5.81	5.79	0.9	0.16	3.27	0.88	2.76	3	1	1100
97	Tas.jpg	Tas	Tas	57	2.71	4.16	6.12	0.94	0.25	2.07	1.77	4.73	3	1	1033
98	Schooltas.jpg	Schooltas	Tas	99	4.03	3.71	5.88	0.65	0.21	4	1.77	4.73	9	2	1172
99	Wolf.jpg	Wolf	Wolf	134	4.77	5.84	6.06	1	0	3.53	1.31	2.7	4	1	1057
100	Brommer.jpg	Brommer	Motor	80	4.14	4.87	6	0.53	0.31	4.67	1.63	2.95	7	2	1180
101	Broomfiets.jpg	Bromfiets	Motor	114	4.66	4.45	5.61	0.48	0.48	5.23	1.63	2.95	9	2	1143
102	Vogel.jpg	Vogel	Roodborstje	98	2.97	4.74	6.15	0.71	0.39	1.83	-0.26	2.57	5	2	1193
103	Slee.jpg	Slee	Slee	132	4.11	6.52	6.18	0.94	0.16	2.33	0.62	2.69	4	1	1003
104	Ster.jpg	Ster	Ster	73	2.26	3.84	6.42	0.94	0.25	2.43	1.64	3.62	4	1	965
105	Bride.jpg	Bruid	Bride	78	4.46	5.52	5.88	0.75	0.35	4.47	1.22	1.73	5	1	1199
106	Webcam.jpg	Webcam	Camera	23	2.77	4.48	6.06	0.65	0.28	6.87	1.78	3.87	6	2	1105
107	Goudstaff.jpg	Goudstaaf	Goud	110	2.83	6.39	6.33	0.56	0.31	5.33	1.79	2.97	9	2	1094
108	Tarwe.jpg	Tarwe	Graan	66	3.8	6.35	4.55	0.43	0.27	5.13	0.64	3.4	5	1	1098
109	Haas.jpg	Haas	Haas	136	3.6	5.94	6.12	0.78	0.48	3	0.34	2.63	4	1	1014
110	Kameel.jpg	Kameel	Kameel	70	4.14	5.94	6.39	0.91	0.2	4.17	0.43	2.48	6	2	1222
111	Klimrek.jpg	Klimrek	Klimrek	106	4.83	5.23	5.76	0.38	0.32	3.5	-0.37	2.7	7	2	1306
112	Geld.jpg	Geld	Geld	86	3.86	6	5.94	1	0	2.63	2.9	4.73	4	1	921
113	Kalendar.jpg	Kalender	Kalender	85	4.54	4.42	5.61	0.88	0.19	4.33	0.53	3.97	8	3	1090
114	Koffer.jpg	Koffer	Koffer	52	2.54	3.84	6.48	0.84	0.24	3.37	1.53	3.93	6	2	1078
115	Palm.jpg	Palm	Palmboom	93	3.23	6	5.36	0.91	0.09	5.24	-0.16	2.78	4	1	1079
116	Parfum.jpg	Parfum	Parfum	49	2.57	4.97	5.39	0.84	0.19	4.5	1.04	4.07	6	2	1160
117	Visser.jpg	Visser	Visser	41	5.31	5.52	5.3	0.57	0.23	3.8	0.63	2.48	6	2	1198
118	Zeehond.jpg	Zeehond	Zeehond	102	3.83	6	6.24	0.72	0.22	3.87	-0.24	2.57	7	2	1236
119	Appelboom.jpg	Appelboom	Appelboom	117	5.14	5.74	5.85	0.91	0.2	3.43	-0.37	2.59	9	3	1126
120	Haai.jpg	Haai	Haai	28	2.6	5.26	6.52	0.94	0.16	3	0.97	2.6	4	1	851
121	Ketting.jpg	Ketting	Ketting	84	3.49	3.03	5.97	0.94	0.16	2.9	1.28	3.79	7	2	1032
122	Klaver.jpg	Klaver	Klavertjevier	98	3.89	6.29	4.94	0.87	0.17	4.17	-0.69	2.31	6	2	1177
123	Kreeft.jpg	Kreeft	Kreeft	46	2.49	5.87	6.27	0.81	0.42	4.37	0.74	2.55	6	1	1071
124	Nijlpaard.jpg	Nijlpaard	Nijlpaard	108	4.09	6.19	6.33	0.9	0.16	4.57	0.22	2.69	9	2	1217
125	Eikel.jpg	Eikel	Eikel	109	4	5.68	5.64	0.76	0.2	3.63	1.83	3	5	2	1184
126	Gras.jpg	Gras	Gras	38	3.11	4.94	6.48	0.91	0.2	2.03	1.27	3.97	4	1	991
127	Haan.jpg	Haan	Haan	119	3.46	6.39	6.45	0.97	0.16	2.4	0.63	2.79	4	1	993
128	Pitchfork.jpg	Hooivork	Hark	92	4.29	6.39	6.24	0.37	0.29	5.27	0.18	2.83	8	2	1194
129	Hert.jpg	Hert	Hert	84	4.6	6.16	6.33	0.88	0.25	3.07	0.79	2.92	4	1	1108
130	Ree.jpg	Ree	Hert	142	3.89	5.29	5.48	0.84	0.2	4.53	0.79	3.34	3	1	1391
131	Koek.jpg	Koek	Koek	75	2.49	3.35	6.27	0.63	0.23	1.87	0.51	4.03	4	1	1177
132	Gehaktball.jpg	Gehaktbal	Koek	92	2.37	3.35	6.33	0.29	0.42	3.93	0.51	4.03	9	3	1698
133	Kruis.jpg	Kruis	Kruis	48	3.86	5.71	5.7	0.94	0.16	3.07	1.32	2.93	5	1	1071
134	Prei.jpg	Prei	Prei	73	2.57	6.32	6.27	0.84	0.24	3.83	-0.57	3.37	4	1	1193
135	Radijs.jpg	Radijs	Radijs	71	2.77	5.94	5.58	0.87	0.16	5.4	-0.39	2.66	6	2	1217
136	Raket.jpg	Raket	Raket	57	4.71	5.97	6.06	0.97	0.16	4.03	1.17	2.5	5	2	1091
137	Vlieger.jpg	Vlieger	Vlieger	43	2.86	5.87	6.12	1	0	3.37	0.58	2.66	7	2	877
138	Wieg.jpg	Wieg	Wieg	52	4.83	3.74	5.88	0.8	0.2	3	0.61	2.57	4	1	1213
139	Dirigent.jpg	Dirigent	Dirigent	70	4.57	4.94	5.36	0.75	0.22	5.93	-0.06	2.6	8	3	1236
140	Eend.jpg	Eend	Eend	141	3.51	5.84	6.45	1	0	2.03	0.95	3.59	4	1	1071
141	Ligstoel.jpg	Ligstoel	Ligstoel	118	3.77	5.16	5.52	0.48	0.32	4.8	-0.68	2.63	8	2	1295
142	Mug.jpg	Mug	Mug	31	2.14	5.84	5.94	0.9	0.26	3.03	0.35	3.83	3	1	1093
143	Pauw.jpg	Pauw	Pauw	172	5.83	6.48	6.12	1	0	3.57	-0.02	2.73	4	1	890
144	Prikbord.jpg	Prikbord	Prikbord	93	1.91	6.35	6.18	0.9	0.16	4.53	-0.21	2.77	8	2	1336
145	Voet.jpg	Voet	Voet	48	3.8	5.42	6.61	0.59	0.31	1.63	1.71	4.45	4	1	1083
146	Ring.jpg	Ring	Ring	36	1.71	5.39	6.58	0.81	0.42	2.53	1.72	3.93	4	1	921
147	Bezem.jpg	Bezem	Bezem	109	3.46	4.55	6.58	0.81	0.29	3.43	0.58	3.34	5	2	1235
148	Ham.jpg	Ham	Ham	53	3.6	3.9	5.67	0.63	0.23	2.5	1.02	3.38	3	1	1233
149	Kraai.jpg	Kraai	Kraai	129	3.14	6.23	5.64	0.7	0.21	3.47	0.42	2.8	5	1	1167
150	Oor.jpg	Oor	Oor	65	2.51	6.19	6.52	0.94	0.25	1.57	1.4	4.5	3	1	888
151	Abrikoos.jpg	Abrikoos	Perzik	9	2.4	5.87	5.61	0.63	0.23	4.7	0.36	3.37	8	3	1412
152	Geraamte.jpg	Geraamte	Skelet	50	3.54	5.03	4.88	0.97	0.04	6.17	0.45	3	8	2	830
153	Bubbel.jpg	Bubbel	Water	38	3.74	3.13	5.73	0.81	0.18	2.97	2.39	4.86	6	2	1309
154	Regenpijp.jpg	Regenpijp	Water	43	3.29	4.26	5.55	0.81	0.17	4.93	2.39	4.86	9	3	1297
155	Chokolade.jpg	Chocolade	Chocolade	73	2.29	5.87	6.06	0.9	0.26	3.3	1.14	4.17	9	3	940
156	Garnaal.jpg	Garnaal	Garnaal	50	2	5.84	5.97	1	0	5.07	0.26	2.97	7	2	1033
157	Haven.jpg	Haven	Haven	97	6.26	6.06	5.21	0.39	0.19	4.67	1.23	2.7	5	2	1316
158	Kwal.jpg	Kwal	Kwal	36	4.54	5.32	6	0.87	0.26	3.9	0.25	2.57	4	1	1004
159	Riet.jpg	Riet	Riet	107	3.89	4.94	4.76	0.3	0.22	4.7	-0.06	2.21	4	1	1256
160	Dolfijn.jpg	Dolfijn	Dolfijn	96	2.94	6.42	6.61	0.9	0.16	3.07	0.28	2.6	7	2	913
161	Geit.jpg	Geit	Geit	86	4.69	5.55	6.42	0.68	0.28	2.63	0.91	3.07	4	1	1025
162	Bok.jpg	Bok	Giet	124	3.83	5.16	5.12	0.66	0.23	3.7	0.54	2.37	3	1	1196
163	Gitaar.jpg	Gitaar	Gitaar	113	4.43	5.94	6.61	0.94	0.25	3.53	1.06	3.34	6	2	1012
164	Basgitaar.jpg	Basgitaar	Gitaar	79	4.49	5.35	5.48	0.56	0.38	5.97	1.06	3.34	9	2	1267
165	Kat.jpg	Kat	Kat	72	3.49	5.74	6.58	0.63	0.53	1.77	1.72	4.14	3	1	1120
166	Neushoorn.jpg	Neushoorn	Neushoorn	123	4.17	6.29	6.24	0.94	0.16	3.93	0.4	2.48	9	2	1148
167	Plaat.jpg	Plaat	Plaat	38	1.17	4.55	4.24	0.39	0.25	3.7	1.14	2.9	5	1	1316
168	Schroef.jpg	Schroef	Schroef	47	1.54	5.97	5.58	0.9	0.26	4.53	0.29	2.77	7	1	1118
169	Hemmelbed.jpg	Hemelbed	Bed	79	5.09	4.39	5.52	0.6	0.26	5.87	2.38	4.9	8	3	1240
170	Brug.jpg	Brug	Brug	92	5.74	5	6.3	0.83	0.27	3.17	1.64	3.7	4	1	1159
171	Ballon.jpg	Ballon	Ballon	33	2	6.03	6.48	0.94	0.16	2.1	0.72	3.62	6	2	807
172	Beker.jpg	Beker	Beker	41	3.91	2.55	6	0.44	0.26	2.2	0.94	4.13	5	2	1625
173	Framboos.jpg	Framboos	Framboos	56	1.74	6.29	6.27	1	0	4.4	-0.57	3.1	8	2	1065
174	Glas.jpg	Glas	Glas	46	3.34	5.52	5.73	0.66	0.24	2.5	1.76	4.66	4	1	1057
175	Jurk.jpg	Jurk	Jurk	51	3	4.97	6.39	0.83	0.16	2.33	1.75	3.83	4	1	1120
176	Kaars.jpg	Kaars	Kaars	41	3.57	5.26	6.61	1	0	3.03	0.77	3.97	5	1	1029
177	Klomp.jpg	Klomp	Klomp	86	2.8	5.19	6.09	1	0	3.43	-0.05	2.6	5	1	1061
178	Kruiwagen.jpg	Kruiwagen	Kruiwagen	75	4.6	5.42	6	1	0	4.1	0.1	2.53	9	3	1140
179	Maiskolf.jpg	Maiskolf	Mais	59	2.46	5.97	6.3	0.63	0.42	5	-0.12	3.3	8	2	944
180	Microfoon.jpg	Microfoon	Microfoon	53	2.31	4.9	6.3	0.97	0.16	4.63	1.01	3.03	9	3	944
181	Mond.jpg	Mond	Mond	80	2.91	5.84	6.15	0.88	0.24	1.7	2.22	4.6	4	1	898
182	Papegaai.jpg	Papegaai	Papegaai	52	4.26	4.61	6.3	0.94	0.16	3.97	0.52	2.77	8	3	1111
183	Slijper.jpg	Slijper	Puntenslijper	67	2.14	5.68	4.3	0.87	0.17	4.37	-1.34	2.97	7	2	1118
184	Roltrap.jpg	Roltrap	Roltrap	107	5.2	6.1	6.18	0.84	0.19	3.93	-0.04	3.5	7	2	1075
185	Shaap.jpg	Schaap	Schaap	147	3.23	6.16	6.48	1	0	2.4	0.82	3.34	6	1	953
186	Slak.jpg	Slak	Slak	102	4.74	6.42	6.36	1	0	2.7	0.38	2.5	4	1	915
187	Sneeuwman.jpg	Sneeuwman	Sneeuwpop	71	3.66	6	6	0.88	0.17	3.4	0.03	2.9	9	2	962
188	Stier.jpg	Stier	Stier	34	3	5.39	6.36	0.71	0.5	3.5	0.98	2.77	5	1	1371
189	Trompet.jpg	Trompet	Trompet	107	3.17	6.23	6.55	0.97	0.16	4.47	0.43	2.77	7	2	1042
190	Vliegtuig.jpg	Vliegtuig	Vliegtuig	15	2.51	6.35	6.52	1	0	3.17	1.95	3.27	9	2	870
191	Wijnglas.jpg	Wijnglas	Wijn	18	1.29	5.94	6.64	0.5	0.3	5.13	1.78	3.8	8	2	1191
192	Boter.jpg	Boter	Boter	36	2.63	4	5.67	0.68	0.2	2.73	1.02	3.9	5	2	1483
193	Berg.jpg	Berg	Berg	59	4.51	6.1	6.21	0.58	0.23	2.77	1.54	3.21	4	1	1381
194	Postvak.jpg	Postvak	Brievenbus	95	2.31	3.19	4.82	0.77	0.37	5.27	0.63	4	7	2	1256
195	Broek.jpg	Broek	Broek	54	1.77	4.97	6.24	0.56	0.34	1.9	1.83	4.77	5	1	932
196	Gieter.jpg	Gieter	Gieter	44	1.43	5.1	6.42	1	0	3.43	-0.49	2.97	6	2	873
197	Kok.jpg	Kok	Kok	57	5.17	5.23	5.67	1	0	3.03	1.15	3	3	1	1069
198	Lataarn.jpg	Lantaarn	Lantaarn	50	3.29	4.16	6.03	0.5	0.25	4.17	0.22	3.62	8	2	1447
199	Paprika.jpg	Paprika	Paprika	46	1.57	6.74	6.64	1	0	3.87	0.12	3.9	7	3	957
200	Regenboog.jpg	Regenboog	Regenboog	37	2.66	6.48	6.73	1	0	3.1	0.65	2.87	9	3	813
201	Rits.jpg	Rits	Rits	45	1.86	5.16	6.15	0.94	0.25	3	0.64	4.13	4	1	808
202	Roeiboot.jpg	Roeiboot	Roeiboot	62	3.77	3.84	6.09	0.57	0.26	4.43	-0.02	2.3	8	2	1579
203	Slurf.jpg	Slurf	Slurf	84	3.6	5.55	6.24	0.73	0.2	3.73	-0.05	2.67	5	1	1081
204	Spons.jpg	Spons	Spons	51	1.66	5.84	6.15	0.94	0.16	3.33	0.4	3.48	5	1	931
205	Visnet.jpg	Visnet	Visnet	71	5.46	3.19	5.79	0.36	0.24	4.67	-0.6	2.28	6	2	1614
206	Worm.jpg	Worm	Worm	82	3.8	5.23	6.24	0.64	0.22	2.67	0.96	2.67	4	1	1398
207	Zeef.jpg	Zeef	Zeef	75	2.17	4.52	5.79	0.61	0.31	4.4	-0.24	3.03	4	1	1222
208	Mus.jpg	Mus	Mus	81	3.09	5.94	5.7	0.5	0.29	3.17	0.08	3.21	3	1	1147
209	Bloemkool.jpg	Bloemkool	Bloemkool	51	1.97	6.71	6.61	0.94	0.16	3.63	-0.26	3.97	9	2	1084
210	Ezel.jpg	Ezel	Ezel	134	4.71	6.03	6.33	0.97	0.16	2.9	1.06	2.79	4	2	1024
211	Hunter.jpg	Jager	Geweer	51	3.91	5.1	4.76	0.47	0.25	4.1	1.74	2.6	5	2	1234
212	Helm.jpg	Helm	Helm	58	2.37	5.29	6.21	0.75	0.5	3.63	1.04	2.86	4	1	886
213	Kraan.jpg	Kraan	Hijskraan	22	3.43	2.71	6.21	0.77	0.23	2.77	-0.53	2.72	5	1	1165
214	Dwerg.jpg	Dwerg	Kabouter	43	2.6	4.26	5.45	0.34	0.37	3.5	0.25	2.37	5	1	1110
215	Kerk.jpg	Kerk	Kerk	53	4.83	5.29	6.64	0.94	0.16	2.87	1.9	3.17	4	1	1134
216	Kers.jpg	Kers	Kers	84	3.31	5.87	6.67	1	0	3.37	0.21	3.31	4	1	1085
217	Mand.jpg	Mand	Mand	115	2.54	5.06	5.79	0.9	0.16	3	0.63	3	4	1	1031
218	Munt.jpg	Munt	Munt	23	1.8	3.58	6.03	0.39	0.23	3.27	1.04	4.2	4	1	1252
219	Muts.jpg	Muts	Muts	85	1.91	5.97	6.24	1	0	2.7	0.65	3.7	4	1	881
220	Passpoort.jpg	Paspoort	Passpoort	63	4.29	4.52	6.15	0.94	0.16	5.67	1.27	3.37	8	2	1146
221	Sock.jpg	Sok	Sok	50	2.03	4.42	6.42	0.88	0.24	1.93	0.49	4.47	3	1	1046
222	Uil.jpg	Uil	Uil	98	4.06	5.97	6.24	0.91	0.2	3.43	0.5	2.55	3	1	1027
223	Vlag.jpg	Vlag	Vlag	91	3.29	4.42	6.12	1	0	3.23	1.25	3.1	4	1	1073
224	Voetbal.jpg	Voetbal	Voetbal	89	3.63	4.97	6.73	0.81	0.45	2.77	1.11	3.41	7	2	925
225	Kooi.jpg	Kooi	Vogelkooi	61	3.46	5.71	6.21	0.77	0.42	4.13	-0.32	2.5	4	1	1104
226	Leeuw.jpg	Leeuw	Leeuw	106	4.03	6.13	6.55	1	0	2.63	1.17	2.91	5	1	925
227	Banaan.jpg	Banaan	Banaan	36	1.23	6.39	6.85	1	0	2.17	0.73	3.93	6	2	711
228	Aardbei.jpg	Aardbei	Aardbei	81	2.06	6.58	6.73	1	0	2.6	0.19	3.86	7	2	785
229	Beer.jpg	Beer	Beer	77	4.69	6.03	6.27	0.81	0.29	2.1	1.41	2.66	4	1	1096
230	Brood.jpg	Brood	Brood	60	1.49	5.94	6.55	0.94	0.16	2.03	1.53	4.6	5	1	944
231	Druif.jpg	Druif	Druif	118	4.03	4.9	6.45	0.5	0.24	2.9	0.13	3.59	5	1	1139
232	Paasei.jpg	Paasei	Paasei	50	2.66	3.94	6.36	0.75	0.26	3.07	-0.68	2.8	6	2	1390
233	Waterpomp.jpg	Waterpomp	Pomp	53	5.63	5.26	4.7	0.48	0.24	5.67	0.82	3.07	9	3	1549
234	Pony.jpg	Pony	Pony	136	4.37	6.13	6.21	0.46	0.4	2.83	0.69	2.86	4	2	1309
235	Pop.jpg	Pop	Pop	104	4.23	3.68	5.91	1	0	1.63	1.38	2.8	3	1	1158
236	Zonnebrill.jpg	Zonnebril	Zonnebril	28	2.03	4.71	6.64	0.72	0.51	3.57	0.69	3.41	9	3	967
237	Meeuw.jpg	Meeuw	Meeuw	91	3.11	6.35	6.24	0.84	0.24	3.73	-0.19	2.93	5	1	1229
238	Trap.jpg	Trap	Trap	110	3.51	4.97	6.3	0.94	0.16	2.23	1.72	4.67	4	1	903
239	Bril.jpg	Bril	Bril	36	1.2	5.52	6.7	0.97	0.16	2.67	1.39	3.77	4	1	878
240	Clown.jpg	Clown	Clown	91	4.34	4.87	6.58	1	0	2.6	1.07	2.6	5	1	922
241	Goudvis.jpg	Goudvis	Goudvis	95	3.94	6.19	6.64	0.81	0.42	3.2	0.27	3.17	7	2	1021
242	Ijsbeer.jpg	Ijsbeer	Ijsbeer	91	3.49	6.35	6.36	0.88	0.19	3.67	0	2.43	7	2	1079
243	Klok.jpg	Klok	Klok	75	3.46	4.9	6.42	0.94	0.16	2.63	1.38	4.53	4	1	1058
244	Pepermunt.jpg	Pepermunt	Pepermunt	34	3.06	5.65	5.76	0.59	0.2	4.43	-0.12	3.47	9	3	1200
245	Raam.jpg	Raam	Raam	75	4.09	3.74	6.36	0.69	0.21	2.07	1.85	4.6	4	1	1181
246	Riem.jpg	Riem	Riem	47	2.26	5.87	6.15	1	0	3.03	1.15	3.67	4	1	874
247	Tafel.jpg	Tafel	Tafel	126	4.69	3.84	6.67	0.91	0.2	2.27	1.92	4.47	5	2	1170
248	Vaas.jpg	Vaas	Vaas	59	2.43	3.55	6	0.71	0.28	3.2	0.66	3.2	4	1	1107
249	Wolk.jpg	Wolk	Wolk	64	3.86	5.52	6.39	0.81	0.23	2.2	0.74	3.97	4	1	1038
250	Schaar.jpg	Schaar	Schaar	50	1.46	6.06	6.61	1	0	2.53	0.8	4	6	1	797
251	Caravan.jpg	Caravan	Caravan	95	4.37	6.13	6.3	0.9	0.26	4.6	0.71	2.73	7	3	1120
252	Egel.jpg	Egel	Egel	126	4.34	6.13	6.52	1	0	2.87	-0.24	2.73	4	2	988
253	Emmer.jpg	Emmer	Emmer	112	3.14	4.39	6.52	0.81	0.42	2.53	0.83	3.21	5	2	1239
254	Hond.jpg	Hond	Hond	98	3.97	4.81	6.39	0.71	0.21	1.8	2.23	3.76	4	1	1191
255	Labrador.jpg	Labrador	Hond	53	2	5.39	6.06	0.56	0.36	5.33	2.23	3.76	8	3	745
256	Kar.jpg	Kar	Kar	80	4.6	3.9	5.42	0.56	0.27	2.6	0.83	2.97	3	1	1359
257	Kasteel.jpg	Kasteel	Kasteel	67	5.34	5.48	6.52	0.62	0.27	3.07	1.44	2.6	7	2	1234
258	Kerstboom.jpg	Kerstboom	Kerstboom	91	4.57	5.58	6.76	0.9	0.26	2.93	0.58	3.1	9	2	1028
259	Kip.jpg	Kip	Kip	116	3.17	5.35	6.39	0.81	0.45	1.97	1.58	4.38	3	1	1052
260	Laader.jpg	Ladder	Ladder	79	3.17	6.16	6.45	0.91	0.32	3.73	0.99	3	6	2	1012
261	Mier.jpg	Mier	Mier	95	2.86	6	6.33	1	0	2.6	0.4	2.8	4	1	995
262	Muis.jpg	Muis	Muis	82	3.49	5.03	6.55	0.9	0.16	2.27	1.05	3.47	4	1	1191
263	Neus.jpg	Neus	Neus	86	3.66	5.77	6.64	1	0	1.8	1.85	4.13	4	1	898
264	Pelikaan.jpg	Pelikaan	Pelikaan	89	4.46	5.48	5.36	0.68	0.31	5.53	-0.28	2.17	8	3	1327
265	Pinda.jpg	Pinda	Pinda	91	2.37	5.9	6.33	0.63	0.29	3.3	0.33	3.83	5	2	1325
266	Touw.jpg	Touw	Touw	118	4.37	5.61	6.03	1	0	2.83	1.42	3.21	4	1	1065
267	Zwijn.jpg	Zwijn	Varken	142	4.63	4.13	5.64	0.94	0.12	4.03	1.39	3.2	5	1	1099
268	Vis.jpg	Vis	Vis	27	2.14	5.71	6.27	0.97	0.16	2.07	1.7	3.76	3	1	913
269	Zeep.jpg	Zeep	Zeep	76	2.8	4.84	6.33	0.86	0.17	2.27	1.15	4	4	1	1136
270	Pijl.jpg	Pijl	Pijl	77	2.23	3.23	5.97	1	0	3.27	0.85	2.9	4	1	1159
271	Deur.jpg	Deur	Deur	72	3.11	4.68	6.45	0.77	0.29	2.07	2.39	4.48	4	1	999
272	Lamp.jpg	Lamp	Lamp	58	2.49	4.48	6.15	0.91	0.16	2.3	1.14	4.4	4	1	947
273	Aardappel.jpg	Aardappel	Aardappel	36	1.97	5.94	6.36	0.61	0.19	2.8	0.52	3.8	9	3	1433
274	Boot.jpg	Boot	Boot	82	4.06	5	6.39	0.52	0.29	2.5	1.98	2.79	4	1	1327
275	Schip.jpg	Schip	Boot	102	5.14	5.42	5.97	0.6	0.29	2.8	1.98	2.95	5	1	1167
276	Stroomboot.jpg	Stoomboot	Boot	83	5	4.13	6.06	0.63	0.31	3.03	1.98	2.95	9	2	1266
277	Veerboot.jpg	Veerboot	Boot	81	5.4	4.77	4.94	0.46	0.27	4.97	1.98	2.95	8	2	1317
278	Motorboot.jpg	Motorboot	Boot	89	4.2	4.48	5.24	0.79	0.24	5.53	1.98	2.95	9	3	1580
279	Kaas.jpg	Kaas	Kaas	87	4.26	4.32	6.52	1	0	2.13	1.36	4.21	4	1	1137
280	Pistool.jpg	Pistool	Pistool	46	2.43	5.48	6.55	0.81	0.32	4.07	2.01	2.5	7	2	1106
281	Poes.jpg	Poes	Poes	89	4.2	5.68	6.52	0.5	0.31	1.83	0.82	3.93	4	1	1018
282	Tram.jpg	Tram	Tram	90	5.34	5.77	5.97	0.78	0.33	4.6	0.26	3.07	4	1	1073
283	Vinger.jpg	Vinger	Vinger	28	3.2	5.84	6.7	0.66	0.23	1.8	1.46	4.6	6	2	1111
284	Viool.jpg	Viool	Viool	40	2.8	6.35	6.48	0.84	0.24	4.43	0.63	2.8	5	1	1074
285	Vork.jpg	Vork	Vork	36	1.89	6.23	6.67	1	0	2.2	0.72	4.69	4	1	781
286	Zwaan.jpg	Zwaan	Zwaan	142	3.86	5.84	6.45	0.94	0.25	2.93	0.3	2.9	5	1	1012
287	Drain.jpg	Afvoerput	Put	26	3.49	4.39	4.64	0.61	0.21	5.87	1.07	2.63	9	3	1264
288	Baksteen.jpg	Baksteen	Baksteen	125	4.11	5.35	6.45	0.65	0.31	4.17	0.28	3.38	8	2	1111
289	Bierglas.jpg	Bierglas	Bier	90	2.54	5.42	6.45	0.72	0.31	5.57	1.73	4.31	8	2	929
290	Borstel.jpg	Borstel	Borstel	39	1.71	3.65	6.15	0.72	0.19	3.4	0.32	4.17	7	2	1086
291	Pizza.jpg	Pizza	Pizza	103	2.83	6.03	6.76	1	0	3.47	1.39	4.17	5	2	898
292	Schommel.jpg	Schommel	Schommel	99	4.03	5.55	6.3	0.97	0.16	2.57	0.2	3	8	2	878
293	Tent.jpg	Tent	Tent	119	4.43	5	6.36	0.94	0.16	2.9	1.61	3.03	4	1	1111
294	Tijger.jpg	Tijger	Tijger	133	4.46	6.35	6.45	0.94	0.25	2.87	1.07	2.79	6	2	1158
295	Bal.jpg	Bal	Voetbal	118	2.83	5.71	6.61	0.75	0.31	1.47	1.11	3.41	3	1	926
296	Zaag.jpg	Zaag	Zaag	50	1.66	5.48	6.3	0.94	0.16	3.53	0.55	2.72	4	1	827
297	Zebra.jpg	Zebra	Zebra	113	3.83	6.39	6.55	0.97	0.16	3.57	0.49	2.57	5	2	866
298	Zeilschip.jpg	Zeilschip	Zeilboot	21	5.43	5.55	5.64	0.66	0.26	5.27	0.14	2.3	9	2	1053
299	Autobus.jpg	Bus	Bus	86	4.8	4.71	6.48	0.97	0.04	2.33	1.81	4.47	3	1	1001
300	Aap.jpg	Aap	Aap	62	4	4.39	6.39	0.63	0.24	2	1.46	3.34	3	1	1181
301	Baby.jpg	Baby	Baby	49	4.06	5.23	6.21	0.94	0.16	1.73	2.18	3.47	4	2	943
302	Hamer.jpg	Hamer	Hamer	36	1.37	6.29	6.58	1	0	3.33	0.93	3.1	5	2	798
303	Hand.jpg	Hand	Hand	62	2.31	5.9	6.52	0.97	0.16	1.67	2.3	4.86	4	1	826
304	Koe.jpg	Koe	Koe	82	4.03	5.84	6.52	0.97	0.16	1.87	1.27	3.23	3	1	1078
305	Mes.jpg	Mes	Mes	23	1.31	4.55	6.55	0.97	0.16	2.23	1.67	4.63	3	1	966
306	Olifant.jpg	Olifant	Olifant	115	4.03	6.74	6.73	1	0	2.93	1.08	3.03	7	3	960
307	Oog.jpg	Oog	Oog	81	3.86	5.9	6.61	1	0	1.8	1.84	4.7	3	1	938
308	Rolstoel.jpg	Rolstoel	Rolstoel	149	5.29	5.65	6.39	1	0	4.03	0.92	2.93	8	2	996
309	Schildpad.jpg	Schildpad	Schildpad	163	3.77	6.16	6.52	1	0	3.67	0.64	2.67	9	2	969
310	Vouwstoel.jpg	Klapstoel	Stoel	111	3.8	4.68	5.97	0.84	0.21	4.83	1.71	4.37	9	2	967
311	Huis.jpg	Huis	Huis	135	4.54	5.29	6.61	0.97	0.16	1.93	2.91	4.83	4	1	1017
312	Sleutel.jpg	Sleutel	Sleutel	58	1.97	4.13	6.52	1	0	2.87	1.91	4.83	7	2	964
313	Trein.jpg	Trein	Trein	57	5.51	5.97	6.55	0.91	0.16	2.37	1.86	4.72	5	1	1019
314	Wiel.jpg	Wiel	Wiel	43	2.14	4.61	6.27	1	0	2.97	0.85	3.33	4	1	946
315	Appel.jpg	Appel	Appel	40	1.46	6.39	6.85	1	0	1.83	1.01	4.43	5	2	799
316	Boom.jpg	Boom	Boom	123	4.09	4.61	6.55	0.53	0.25	2	1.72	4.36	4	1	1396
317	Fles.jpg	Fles	Fles	23	1.26	4.68	6.45	0.69	0.38	2.13	1.66	4.21	4	1	999
318	Peer.jpg	Peer	Peer	134	4	6.06	6.67	1	0	2.6	0.3	3.67	4	1	914
319	Piano.jpg	Piano	Piano	22	3.8	5.23	6.64	1	0	3.57	1.15	3.62	5	2	957
320	Schoen.jpg	Schoen	Schoen	94	2.86	4.26	6.39	1	0	1.97	1.13	4.67	6	1	961
321	Spin.jpg	Spin	Spin	59	2.31	5.52	6.82	0.84	0.38	2.27	0.89	3.47	4	1	904
322	Televisie.jpg	Televisie	Televisie	47	1.71	4.52	6.42	0.58	0.27	2.7	1.35	4.53	9	4	1105
323	Auto.jpg	Auto	Auto	101	3.74	5.13	6.52	0.79	0.34	1.93	2.66	4.02	4	2	1016
324	Fiets.jpg	Fiets	Fiets	110	3.54	6.13	6.67	0.81	0.22	2.3	1.34	4.9	5	1	935
325	Paard.jpg	Paard	Paard	153	4	5.9	6.73	0.94	0.16	2.1	1.92	3.13	5	1	1085
326	Vlinder.jpg	Vlinder	Vlinder	72	4.03	5.74	6.45	1	0	2.3	0.79	3.2	7	2	925
327	Tomaat.jpg	Tomaat	Tomaat	80	1.66	6.65	6.76	0.97	0.16	2.87	0.47	4.1	6	2	1009
